# Supplementary material for: A non-lethal malarial infection results in reduced drug metabolizing enzyme expression and drug clearance in mice
Source: Springer Nature journal article supplement (doi:10.1186/s12936-019-2860-5), 2019-07-12
Supplement: MOESM1 [file 16924868]

Table S1. Primers used for qPCR

Primers without references were designed using Primer Express® software v2.0 (Applied Biosystems)

| Gene          | Forward primer                   | Reverse primer                   | Reference |
|---------------|----------------------------------|----------------------------------|-----------|
| Gapdh         | AGCCAAACGGGTCATCATCTC            | GGGGGCTAAGCAGTTGGTG              | (1)       |
| Cyp1a2        | TGGAGCTGGCTTTGACACAG             | CGTTAGGCCATGTCACAAGTAGC          | (2)       |
| Cyp2c29       | AAGGTTTTGGCGTTGTTTTAGC           | AGCCTTTGGTTTTCTCAGTTCTT          | (3)       |
| Cyp2d9        | CCTCCAAGGTCAGAAGTCCTTCA          | CGATTTCTTGTGGACTCTGCG            | (4)       |
| Cyp2e1        | AAGCGCTTCGGGCCAG                 | TAGCCATGCAGGACCACGA              | (2)       |
| Cyp3a11       | GGATGAGATCGATGAGGCTCTG           | CAGGTATTCCATCTCCATCACAGT         | (2)       |
| Cyp3a13       | CCTCTGCCTTTCTTGGGGACGAT          | CCGCCGTTTGTGAAGGTAGAGT           | (3)       |
| Cyp3a25       | TTGGAGGCCTGAAGTCTAAAG            | CTGTGGGCCCTCATAAAACC             | (1)       |
| Cyp4a10       | TGTCCCAGGCATTGTCAGAGA            | CCTTCGGGTTGTGGTGGAGA             | (3)       |
| Cyp4a14       | CCCAAAGGTATCACAGCCACAA           | CAGCAATTCAAAGCGGAGCAG            | (3)       |
| Cyp4f18       | AGAGCCTGGTGCGAACCTT              | TGGAATATGCGGATGACTGG             | (5)       |
| Cyp7a1        | TGTCTGCGAGGGGCTGGAGCA            | CCAGCCTGGGATGCTATGGGC            | (6)       |
| Fmo3          | CAGCATTTACCAATCGGTCTTC           | TGACTTCCCATTGCGCAGTAG            | (7)       |
| Sult1b1       | TTGAAGAGTTCCAGAGCA               | GAACCTTTGGAGGTGATAACA            | (8)       |
| Sult1d1       | GAGGGAGTTAGTGGATGTT              | TCACTGACCCAAGTTGTTC              | (8)       |
| Sult2b1       | CAGTCTGGCTGAGAACACTA             | TTCAGGATTAAGCAGACGAT             | (8)       |
| Sult3a1       | CATCGGAACAGAAGTGAACA             | TATGGAATGTGGGAAGTGAAGA           | (9)       |
| Sult3a2       | GATATGGATGCTGTTGTGAGACAA         | TCCAGTCTCCAACGATACCTTTG          | (9)       |
| Ugt1a1        | CCAGCAGAAGGGGCACGAAGTTG          | TGACCACGCGCAGCAGAAAAGAAT         | (10)      |
| Ugt1a2        | TGCCCTCCGAGGAATCTCAG             | CTCCCGCACAAACATCCCTCATG          | (10)      |
| Ugt1a6        | CTGGCTGATGGTGGCTGACTG            | ACTGAGGCCCAAAGCACTAGGAA          | (10)      |
| Ugt1a9        | CAGAGGGCATGAGGTTGTGGA            | TCCTGCAGTGTGAAAATGTTAGTT         | (10)      |
| Ugt2b5        | ACCCAGCAACTTTAGGACACAAT          | TGATAGATCGCCTCGTAGACACCA         | (10)      |
| Car           | CAGACCCGGAGTTACCCAAAGAGA         | GAGCAGCGGCGTCATAGCAGA            | (1)       |
| Fxr           | ACGGGGGCAACTGCGTGATG             | CGCCCTTCGCTGTCGTCCTC             | (1)       |
| Lxra          | CTCAATGCCTGATGTTTCTCCT           | TCCAACCCTATCCCTAAAGCAA           | (11)      |
| Ppara         | GGGGGTGGGAGCATTTC                | GGAGGGGCTAGAGGAGCATTAC           | (1)       |
| Pxr           | CGCGGAGAAGACGGCAGCATC            | CCCAGGTTCCCGTTTCCGTGTC           | (1)       |
| Rxra          | GGCGCCATCTTTGACAGGGTGCTA         | CCGGCTGCTCAGGGTACTTGTGTT         | (1)       |
| Nos2          | CTTCACGGGTGAGAGCCACAGTCC         | GAGCCAAAGCCAAACACAGCATA          | (1)       |
| Hmox1         | AGGAGCTGCACCGAAGGGCT             | GTGGCTGGCGTGCAAGGGAT             |           |
| Abca1         | GGTTTGGAGATGGTTATACAATAGT<br>TGT | TTCCCGAAACGCAAGTC                |           |
| Srbp1c        | GATGTGCGAACTGGACACAG             | CATAGGGGGCGTCAAACAG              | (12)      |
| Abcg1         | AGTCTGACGATGACCAGTGTGAG          | CTTCTAGTTAGAAAAGGAAACGAA<br>CAGT |           |
| Apoe          | GCCGTGCTGTTGGTCACA               | TGCCACTCGAGCTGATCTGT             |           |
| IL1b          | CAACCAACAAGTGATATTCTCCATG        | GATCCACACTCTCCAGCTGCA            | (13)      |
| IL6           | CAACCACGGCCTTCCCTACT             | TCATTTCCACGATTTCCAGAG            | (3)       |
| Ifng          | AACGCTACACACTGCATCTTGG           | GCCGTGGCAGTAACAGCC               | (14)      |
| Tnfa          | GACAAGGCTGCCCGACTACG             | CTTGGGGCAGGGGCTCTTGAC            | (3)       |
| Agp           | CTTCGGGAGTCTCAAACAATAGGT         | GACAGTCCCCGTTTCTTCTCATCC         | (3)       |
| Fga           | AGCAGCCCAGCCACAAGAAAAGAG         | CGTCGAGACTGCCGCTAAAAGTGT         | (3)       |
| Hapt          | TGAACACAGTCGCTGGAGAG             | GCTGCCTTTGGCATCCATAG             | (15)      |
| Saa1/2        | GTAATTGGGGTCTTTGCC               | TTCTGCTCCCTGCTCCTG               | (16)      |
| Sap           | AGGGCAGAGACAATGAGCTACT           | GGACTCCCAAGTGGTACATAGG           | (17)      |
| PccAS<br>MSP1 | ACAGTAACACAAGAAGGAAC             | GATACTTGTGTTGATGCTGG             | (18)      |

## References

1. Mimche SM, Nyagode BA, Merrell MD, Lee CM, Prasanphanich NS, Cummings RD, et al. Hepatic cytochrome P450s, phase II enzymes and nuclear receptors are downregulated in a Th2 environment during *Schistosoma mansoni* infection. *Drug Metab Dispos.* 2014;42:134-40.
2. Pan J, Xiang Q, Ball S. Use of a novel real-time quantitative reverse transcription-polymerase chain reaction method to study the effects of cytokines on cytochrome P450 mRNA expression in mouse liver. *Drug Metab Dispos.* 2000;28:709-13.
3. Richardson TA, Morgan ET. Hepatic cytochrome P450 gene regulation during endotoxin-induced inflammation in nuclear receptor knockout mice. *J Pharmacol Exp Ther.* 2005;314:703-9.
4. Blume N, Leonard J, Xu ZJ, Watanabe O, Remotti H, Fishman J. Characterization of Cyp2d22, a novel cytochrome P450 expressed in mouse mammary cells. *Arch Biochem Biophys.* 2000;381:191-204.
5. Chaluvadi MR, Kinloch RD, Nyagode BA, Richardson TA, Raynor MJ, Sherman M, et al. Regulation of hepatic cytochrome P450 expression in mice with intestinal or systemic infections of *Citrobacter rodentium*. *Drug Metab Dispos.* 2009;37:366-74.
6. Merrell MD, Nyagode BA, Clarke JD, Cherrington NJ, Morgan ET. Selective and cytokine-dependent regulation of hepatic transporters and bile acid homeostasis during infectious colitis in mice. *Drug Metab Dispos.* 2014;42:596-602.
7. Zhang J, Chaluvadi MR, Reddy R, Motika MS, Richardson TA, Cashman JR, et al. Hepatic flavin-containing monooxygenase gene regulation in different mouse inflammation models. *Drug Metab Dispos.* 2009;37:462-8.
8. Enokizono J, Kusuvara H, Sugiyama Y. Regional expression and activity of breast cancer resistance protein (Bcrp/Abcg2) in mouse intestine: overlapping distribution with sulfotransferases. *Drug Metab Dispos.* 2007;35:922-8.
9. Takahashi S, Sakakibara Y, Mishiro E, Kouriki H, Nobe R, Kurogi K, et al. Molecular cloning, expression, and characterization of mouse amine N-sulfotransferases. *Biochem Biophys Res Commun.* 2008;375:531-5.
10. Richardson TA, Sherman M, Kalman D, Morgan ET. Expression of UDP-glucuronosyltransferase isoform mRNAs during inflammation and infection in mouse liver and kidney. *Drug Metab Dispos.* 2006;34:351-3.
11. Haque MW, Bose P, Siddique MUM, Sunita P, Lapenna A, Pattanayak SP. Taxifolin binds with LXR (alpha & beta) to attenuate DMBA-induced mammary carcinogenesis through mTOR/Maf-1/PTEN pathway. *Biomed Pharmacother.* 2018;105:27-36.
12. Penna F, Busquets S, Toledo M, Pin F, Massa D, Lopez-Soriano FJ, et al. Erythropoietin administration partially prevents adipose tissue loss in experimental cancer cachexia models. *J Lipid Res.* 2013;54:3045-51.
13. Overbergh L, Giulietti A, Valckx D, Decallonne R, Bouillon R, Mathieu C. The use of real-time reverse transcriptase PCR for the quantification of cytokine gene expression. *J Biomol Tech.* 2003;14:33-43.
14. Gracie N, Hsieh DT, Buono C, Westrich JR, Allen JA, Pang H, et al. Neutrophils sustain pathogenic CD8+ T cell responses in the heart. *Am J Pathol.* 2003;163:2413-20.
15. Baudino L, Yoshinobu K, Morito N, Kikuchi S, Fossati-Jimack L, Morley BJ, et al. Dissection of genetic mechanisms governing the expression of serum retroviral gp70 implicated in murine lupus nephritis. *J Immunol.* 2008;181:2846-54.

16. Lan JG, Cruickshank SM, Singh JC, Farrar M, Lodge JP, Felsburg PJ, et al. Different cytokine response of primary colonic epithelial cells to commensal bacteria. *World J Gastroenterol.* 2005;11:3375-84.
17. Shirai R, Hirano F, Ohkura N, Ikeda K, Inoue S. Up-regulation of the expression of leucine-rich alpha(2)-glycoprotein in hepatocytes by the mediators of acute-phase response. *Biochem Biophys Res Commun.* 2009;382:776-9.
18. Mimche PN, Brady LM, Bray CF, Lee CM, Thapa M, King TP, et al. The receptor tyrosine kinase EphB2 promotes hepatic fibrosis in mice. *Hepatology.* 2015;62:900-14.
