# Supplementary material for: A non-lethal malarial infection results in reduced drug metabolizing enzyme expression and drug clearance in mice
Source: Springer Nature journal article supplement (doi:10.1186/s12936-019-2860-5), 2019-07-12
Supplement: MOESM2 [file 16924868]

Table S2. Antibodies used for Western blotting

| Mouse target proteins | Antigen used to raise antibodies | Type       | Species | Dilution | Source                                         | Catalog number | Reference |
|-----------------------|----------------------------------|------------|---------|----------|------------------------------------------------|----------------|-----------|
| Cyp2b                 | CYP2B1                           | polyclonal | rabbit  | 1:5000   | James Halpert, University of Connecticut       | N/A            | (1)       |
| Cyp2c                 | CYP2C11                          | polyclonal | rabbit  | 1:10,000 | In-house                                       | N/A            | (2)       |
| Cyp2d                 | Cyp2d9                           | polyclonal | rabbit  | 1:5000   | Masahiko Negishi, NIEHS                        | N/A            | (3)       |
| Cyp2e1                | Rat CYP2E1                       | polyclonal | Rabbit  | 1:5000   | Magnus Ingelman-Sundberg, Karolinska Institute | N/A            | (4)       |
| Cyp3a                 | CYP3A1                           | polyclonal | rabbit  | 1:5000   | James Halpert, University of Connecticut       | N/A            | (5)       |
| Cyp4a                 | CYP4A11 peptide                  | monoclonal | rabbit  | 1:2000   | Abcam, Cambridge, MA                           | Ab-140635      | (6)       |
| Gapdh                 | Rabbit GAPDH                     | monoclonal | mouse   | 1:10,000 | Millipore, Temecula, CA                        | MAB374         | (7)       |
| Nos2                  | Mouse Nos2                       | Polyclonal | rabbit  | 1:2,000  | Santa Cruz Biotechnology, Inc, Santa Cruz, CA  | Sc-650         | (6)       |

### References

1. Duignan DB, Sipes IG, Leonard TB, Halpert JR. Purification and characterization of the dog hepatic cytochrome P-450 isozyme responsible for the metabolism of 2,2',4,4',5,5'-hexachlorobiphenyl. *Arch Biochem Biophys.* 1987;255:290-303.
2. Morgan ET, MacGeoch C, Gustafsson JA. Sexual differentiation of cytochrome P-450 in rat liver. Evidence for a constitutive isozyme as the male-specific 16 alpha-hydroxylase. *Mol Pharmacol.* 1985;27:471-9.
3. Devore K, Harada N, Negishi M. Characterization of testosterone 16 alpha-hydroxylase (I-P-450(16) alpha) induced by phenobarbital in mice. *Biochemistry.* 1985;24:5632-7.
4. Johansson I, Ekstrom G, Scholte B, Puzycki D, Jornvall H, Ingelman-Sundberg M. Ethanol-, fasting-, and acetone-inducible cytochromes P-450 in rat liver: regulation and characteristics of enzymes belonging to the IIB and IIE gene subfamilies. *Biochemistry.* 1988;27:1925-34.

5. Graves PE, Kaminsky LS, Halpert J. Evidence for functional and structural multiplicity of pregnenolone-16 alpha-carbonitrile-inducible cytochrome P-450 isozymes in rat liver microsomes. *Biochemistry*. 1987;26:3887-94.
6. Mimche SM, Nyagode BA, Merrell MD, Lee CM, Prasanphanich NS, Cummings RD, et al. Hepatic cytochrome P450s, phase II enzymes and nuclear receptors are downregulated in a Th2 environment during *Schistosoma mansoni* infection. *Drug Metab Dispos*. 2014;42:134-40.
7. Lee CM, Tripathi S, Morgan ET. Nitric oxide-regulated proteolysis of human CYP2B6 via the ubiquitin-proteasome system. *Free Radic Biol Med*. 2017;108:478-86.
