# Supplementary material for: A non-lethal malarial infection results in reduced drug metabolizing enzyme expression and drug clearance in mice
Source: Springer Nature journal article supplement (doi:10.1186/s12936-019-2860-5), 2019-07-12
Supplement: MOESM3 [file 16924868]

Mimche, SM et al. A nonlethal malarial infection results in reduced drug metabolizing enzyme expression and drug clearance in mice. Fig. S1.

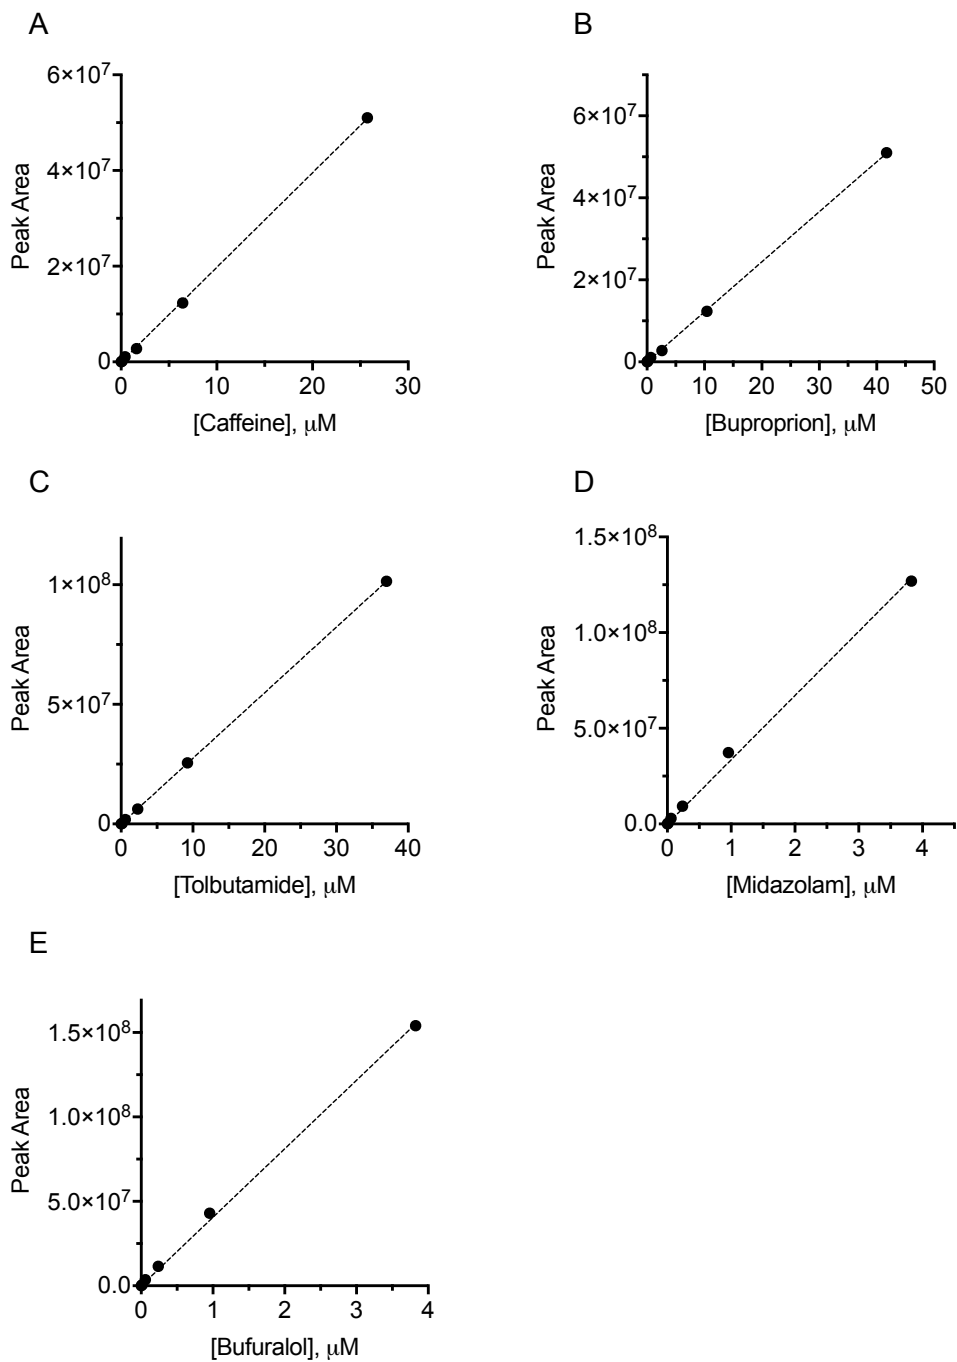

Figure S1. Standard curves for caffeine, bupropion, tolbutamide, midazolam and bufuralol measured by HILIC/MS. The drugs were spiked into naïve blood and processed identically to the experimental samples.
