# Supplementary material for: A non-lethal malarial infection results in reduced drug metabolizing enzyme expression and drug clearance in mice
Source: Springer Nature journal article supplement (doi:10.1186/s12936-019-2860-5), 2019-07-12
Supplement: MOESM6 [file 16924868]

Mimche, SM et al. A nonlethal malarial infection results in reduced drug metabolizing enzyme expression and drug clearance in mice. Fig. S2.

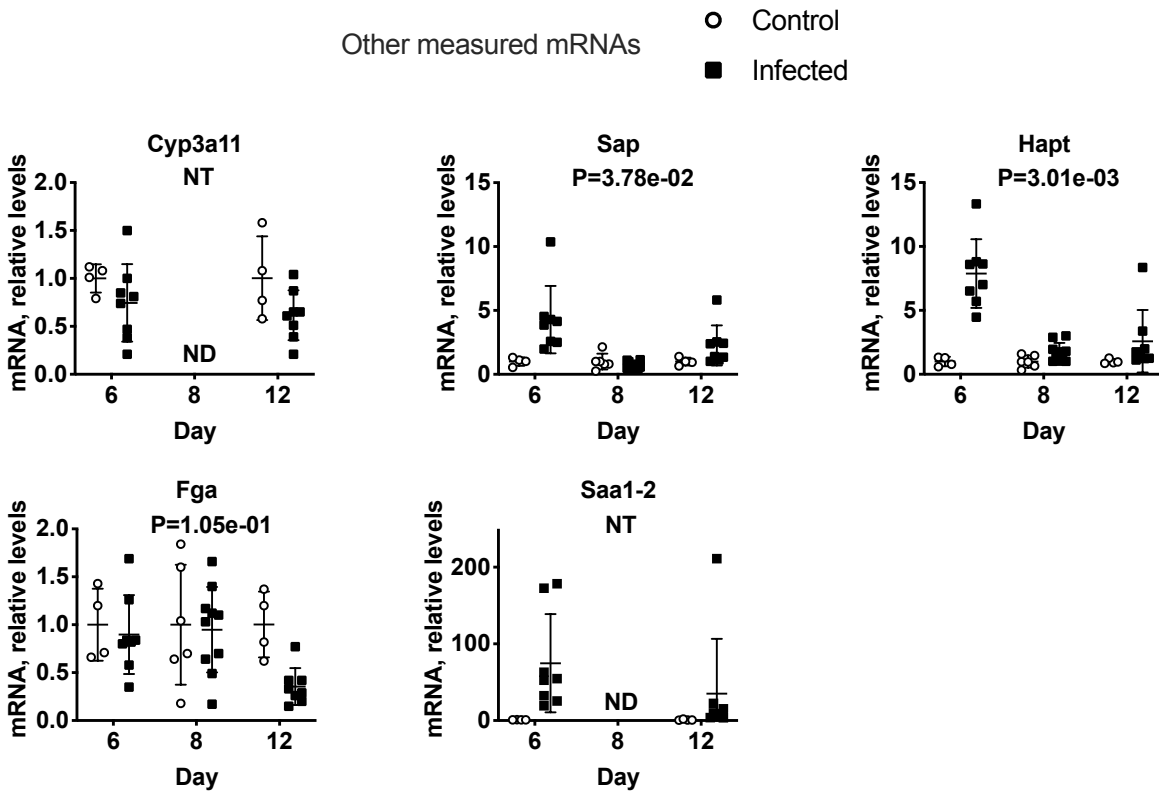

Figure S2. Additional analyses of mRNA expression in mouse livers. Mice were euthanized at 6, 8 and 12 days after infection with *PccAS* and their livers analyzed by RT-qPCR for mRNA expression of the designated genes. The data are the average of two separate experiments. Values are mean  $\pm$  SD, and expression in naïve mice was set at 1. Differences in mRNA expression between control and infected mice among the groups were analyzed by MANOVA with Bonferroni corrected one-way ANOVAs as a post-hoc test. \* $P < 1.47 \times 10^{-3}$ , \*\* $P < 7.35 \times 10^{-4}$ , \*\*\* $P < 1.47 \times 10^{-5}$ , significantly different from naïve group. NT, not tested for significance; ND, not determined. For days 6, 8 and 12,  $n = 4, 6$  and  $4$  in the naïve groups and  $n = 8, 10$  and  $8$  in the infected groups, respectively.
